# Supplementary material
Source: PubMed Central journal article supplement (PMC7316447)
Supplement: mmc1.pdf [file mmc1.pdf]

# THE LANCET

## Child & Adolescent Health

### Supplementary appendix

This appendix formed part of the original submission and has been peer reviewed. We post it as supplied by the authors.

Supplement to: Götzinger F, Santiago-García B, Noguera-Julián A, et al, on behalf of the ptbnet COVID-19 Study Group. COVID-19 in children and adolescents in Europe: a multinational, multicentre cohort study. *Lancet Child Adolesc Health* 2020; published online June 25. [http://dx.doi.org/10.1016/S2352-4642\(20\)30177-2](http://dx.doi.org/10.1016/S2352-4642(20)30177-2).

## Supplementary Appendix

**Supplementary Table S1.** Baseline data on demographics, immunocompromise, clinical features, radiological findings at presentation and support required in patients in whom another viral agent was detected in addition to SARS-CoV-2 (i.e. with viral co-infection) compared to patients without additional viral agents detected. Figures are numbers and percentages; p-values are based on univariable analyses.

|                                          | No additional virus detected (n=553) | Additional virus detected (n=29) | p-value | Odds ratio (95%CI) |
|------------------------------------------|--------------------------------------|----------------------------------|---------|--------------------|
| <b>Age</b> median (IQR), years           | 6 (0.5 – 13.0)                       | 2.0 (0.4 – 5.5)                  | 0.029   | 0.9 (0.8 – 0.9)    |
| <2 years                                 | 214 (38.7)                           | 16 (55.2)                        |         | 1.9 (0.9 – 4.1)    |
| 2-5 years                                | 56 (10.1)                            | 6 (20.7)                         |         | 2.3 (0.9 – 5.9)    |
| 5-10 years                               | 91 (16.4)                            | 3 (10.3)                         |         | 0.5 (0.1 – 1.9)    |
| >10 years                                | 192 (34.7)                           | 4 (13.8)                         |         | 0.3 (0.1 – 0.8)    |
| <b>Age</b> <1 month                      | 39 (7.1)                             | 1 (3.4)                          | 0.71    | 0.4 (0.0 – 3.5)    |
| <b>Gender</b> (male)                     | 295 (53.3)                           | 16 (55.2)                        | 0.84    | 1.0 (0.5 – 2.2)    |
| <b>Immunosuppressive therapy</b> *       | 26 (4.7)                             | 3 (10.3)                         | 0.17    | 2.3 (0.6 – 8.2)    |
| <b>Known Immunodeficiency</b>            | 3 (0.5)                              | 0 (0)                            | 1.00    | - **               |
| <b>Chemotherapy in last 6 months</b>     | 24 (4.3)                             | 1 (3.4)                          | 1.00    | 0.7 (0.1 – 6.0)    |
| <b>Signs and symptoms</b> ***            |                                      |                                  |         |                    |
| Asymptomatic                             | 91 (16.4)                            | 1 (3.4)                          | 0.06    | 0.1 (0.0 – 1.3)    |
| Pyrexia                                  | 361 (65.3)                           | 18 (62.1)                        | 0.72    | 0.8 (0.4 – 1.8)    |
| URTI                                     | 290 (52.4)                           | 23 (79.3)                        | 0.0055  | 3.4 (1.3 – 8.6)    |
| LRTI                                     | 125 (22.6)                           | 18 (62.1)                        | <0.0001 | 5.6 (2.5 – 12.1)   |
| Gastrointestinal                         | 121 (21.9)                           | 7 (24.1)                         | 0.77    | 1.1 (0.4 – 2.7)    |
| Headache ****                            | 67 (27.0)                            | 3 (42.9)                         | 0.39    | 2.0 (0.4 – 9.2)    |
| <b>Radiological findings</b> *****       |                                      |                                  |         |                    |
| Suggestive of pneumonia                  | 83 (45.9)                            | 10 (58.8)                        | 0.30    | 1.6 (0.6 – 4.6)    |
| Suggestive of ARDS                       | 9 (5.0)                              | 1 (5.9)                          | 0.60    | 1.1 (0.1 – 10.0)   |
| <b>Support required during admission</b> |                                      |                                  |         |                    |
| ICU admission                            | 41 (7.4)                             | 7 (24.1)                         | 0.0015  | 3.9 (1.6 – 9.8)    |
| Oxygen therapy                           | 62 (11.2)                            | 12 (41.4)                        | <0.0001 | 5.5 (2.5 – 12.2)   |
| CPAP                                     | 26 (4.7)                             | 5 (17.2)                         | 0.0035  | 4.2 (1.4 – 11.9)   |
| Mechanical ventilation                   | 20 (3.6)                             | 5 (17.2)                         | <0.0001 | 5.5 (1.9 – 16.0)   |
| Inotropic support                        | 16 (2.9)                             | 3 (10.3)                         | 0.063   | 3.8 (1.0 – 14.1)   |

\*At diagnosis of COVID-19.

\*\* Odds ratio not calculated as one of the required values is zero.

\*\*\* Signs and symptoms at initial presentation.

\*\*\*\* Data on presence of headache only includes children  $\geq 5$  years of age in whom those data were recorded (total, n=255; children without additional viral agent, n=248; children with additional viral agent, n=7).

\*\*\*\*\* Chest radiograph performed in n=198 only (children without additional viral agent, n=181; children with additional viral agent, n=17).

Abbreviations: ARDS: acute respiratory distress syndrome, CPAP: Continuous Positive Airway Pressure, ICU: intensive care unit, IQR: interquartile range, LRTI: lower respiratory tract infection, URTI: upper respiratory tract infection.

**Supplementary Table S2.** Baseline demographic data, pre-existing medical conditions, concomitant medication, and radiological findings at presentation comparing patients who received drugs with antiviral activity (hydroxychloroquine, remdesivir, oseltamivir) and/or immunomodulatory drugs (systemic corticosteroids, intravenous immunoglobulin, tocilizumab, anakinra, siltuximab) as treatment for COVID-19, compared to patients who received neither. Figures shown are numbers and percentages; p-values shown are based on univariate analyses. Odds ratios refer to the likelihood of receiving treatment for COVID-19.

|                                        | <b>No treatment<br/>(n=508)</b> | <b>COVID-19-related<br/>treatment<br/>(n=74)</b> | <b>p-value</b> | <b>Univariate<br/>odds ratio<br/>(IQR)</b> |
|----------------------------------------|---------------------------------|--------------------------------------------------|----------------|--------------------------------------------|
| <b>Age</b> median (IQR), years         | 5.0 (0.5 – 12.0)                | 6.0 (1.0 – 12.2)                                 | 0.30           | 1.0 (0.9 – 1.0)                            |
| <2 years                               | 203 (40.0)                      | 27 (36.5)                                        | 0.56           | 0.8 (0.5 – 1.4)                            |
| 2-5 years                              | 54 (10.6)                       | 8 (10.8)                                         | 0.96           | 1.0 (0.4 – 2.2)                            |
| 5-10 years                             | 80 (15.7)                       | 14 (18.9)                                        | 0.48           | 1.2 (0.6 – 2.3)                            |
| >10 years                              | 171 (33.7)                      | 25 (33.8)                                        | 0.98           | 1.0 (0.6 – 1.6)                            |
| <b>Age</b> <1 month                    | 36 (7.1)                        | 4 (5.4)                                          | 0.80           | 0.7 (0.2 – 2.1)                            |
| <b>Gender</b> (male)                   | 239 (47.0)                      | 32 (43.2)                                        | 0.54           | 1.1 (0.7 – 1.9)                            |
| <b>Pre-existing medical conditions</b> |                                 |                                                  |                |                                            |
| Any                                    | 106 (20.9)                      | 39 (52.7)                                        | <0.0001        | 4.2 (2.5 – 6.9)                            |
| Malignancy                             | 15 (3.0)                        | 12 (16.2)                                        | <0.0001        | 6.3 (2.8 – 14.2)                           |
| Cardiac disease                        | 16 (3.1)                        | 9 (12.2)                                         | <0.0001        | 4.2 (1.8 – 10.0)                           |
| Respiratory disease                    | 16 (3.1)                        | 13 (17.6)                                        | <0.0001        | 6.5 (3.0 – 14.2)                           |
| Neurological disease                   | 21 (4.1)                        | 5 (6.8)                                          | 0.30           | 1.6 (0.6 – 4.6)                            |
| Renal disease                          | 8 (1.6)                         | 1 (1.4)                                          | 1.00           | 0.8 (0.1 – 6.9)                            |
| Chromosomal abnormality                | 8 (1.6)                         | 2 (2.7)                                          | 0.37           | 1.7 (0.3 – 8.3)                            |
| Other                                  | 30 (5.9)                        | 5 (6.8)                                          | 0.77           | 1.1 (0.4 – 3.0)                            |
| <b>Immunosuppressive therapy</b> *     | 16 (3.1)                        | 13 (17.6)                                        | <0.0001        | 6.5 (3.0 – 14.2)                           |
| <b>Known immunodeficiency</b>          | 2 (0.4)                         | 1 (1.4)                                          | 0.33           | 3.4 (0.3 – 38.7)                           |
| <b>Chemotherapy in last 6 months</b>   | 14 (2.8)                        | 11 (14.9)                                        | <0.0001        | 6.1 (2.6 – 14.1)                           |
| <b>Radiological findings</b> **        |                                 |                                                  |                |                                            |
| Suggestive of pneumonia                | 48 (35.6)                       | 45 (71.4)                                        | <0.0001        | 4.5 (2.3 – 8.6)                            |
| Suggestive of ARDS                     | 1 (0.7)                         | 9 (14.3)                                         | <0.0001        | 22.3 (2.7 – 180.5)                         |
| <b>Dual viral infection</b>            | 17 (3.3)                        | 12 (16.2)                                        | <0.0001        | 5.5 (2.5 – 12.2)                           |

\* At diagnosis of COVID-19.

\*\*Chest radiograph performed in n=198 only (children without treatment, n=135; children with treatment, n=63).

Abbreviations: ARDS: acute respiratory distress syndrome, IQR: interquartile range, LRTI: lower respiratory tract infection, URTI: upper respiratory tract infection
